# Supplementary material for: Uptake of carbon nanodots into human AML cells in comparison to primary hematopoietic cells
Source: Royal Society of Chemistry journal article supplement (doi:10.1039/d1ra05033h), 2021-01-01
Supplement: d1ra05033h1.pdf [file d1ra05033h1.pdf]

## Supplementary Information

### Uptake of carbon nanodots into human AML cells in comparison to primary hematopoietic cells

Cathrin Nollmann<sup>a</sup>, Christian Wimmenauer<sup>a</sup>, Stefan Fasbender<sup>a</sup>, Saskia Mayer<sup>b</sup>, Ron-Patrick Cadeddu<sup>b</sup>, Paul Jäger<sup>b</sup>, Thomas Heinzl<sup>\*a</sup>, and Rainer Haas<sup>\*b</sup>

*a. Condensed Matter Physics Laboratory, Heinrich-Heine-University, 40204 Düsseldorf, Germany.*

*E-Mail: Thomas.Heinzl@hhu.de*

*b. Department of Haematology, Oncology and Clinical Immunology, Heinrich-Heine-University, 40204 Düsseldorf, Germany.*

*E-Mail: Haas.med@uni-duesseldorf.de*

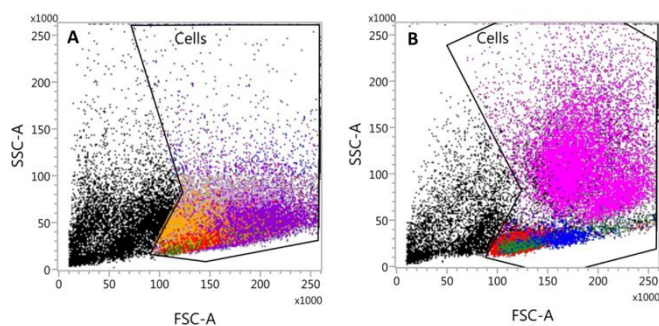

**Fig. S1:** Examples of FSC vs. SSC plots by which the cell population was selected via suitable gates. Shown are AML 2 in (A) and donor 3 in (B). The colours represent the rear projections of further gates that have been set, namely CD33<sup>+</sup> (pink), CD34<sup>+</sup> (blue), CD19<sup>+</sup> (green), CD3<sup>+</sup> (red), CD33<sup>+</sup>/CD34<sup>+</sup> (purple) and CD33<sup>-</sup>/CD34<sup>-</sup> (orange).

**Tab. S1:** Percentage distribution of the CD33<sup>+</sup>, CD34<sup>+</sup>, CD19<sup>+</sup> and CD3<sup>+</sup> populations for all samples.

| sample  | CD33 <sup>+</sup> | CD34 <sup>+</sup> | CD19 <sup>+</sup> | CD3 <sup>+</sup> |
|---------|-------------------|-------------------|-------------------|------------------|
| AML 1   | 7,96%             | 14,40%            | 0,25%             | 0,84%            |
| AML 2   | 77,01%            | 72,55%            | 0,55%             | 4,87%            |
| AML 3   | 88,16%            | 3,82%             | 1,69%             | 6,33%            |
| AML 4   | 42,11%            | 35,50%            | 1,11%             | 31,30%           |
| AML 5   | 84,82%            | 77,05%            | 0,08%             | 1,21%            |
| donor 1 | 33,14%            | 1,89%             | 2,48%             | 43,87%           |
| donor 2 | 43,94%            | 3,56%             | 8,75%             | 36,93%           |
| donor 3 | 24,15%            | 2,13%             | 4,64%             | 47,12%           |

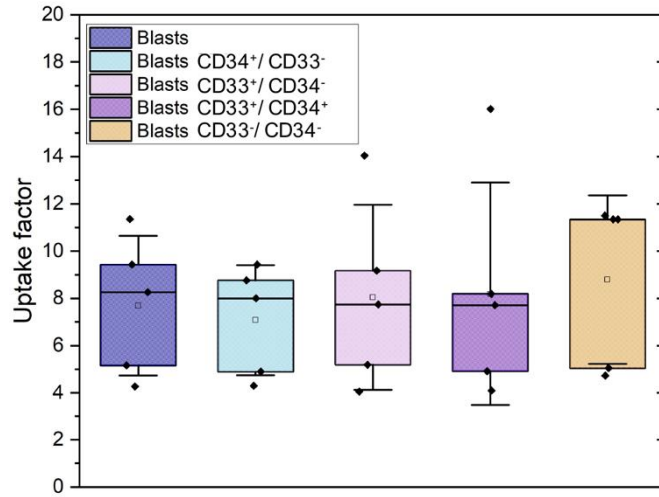

**Fig. S2:** Uptake factors for all blasts and four subsets which were defined by means of the CD34 and CD33 markers.

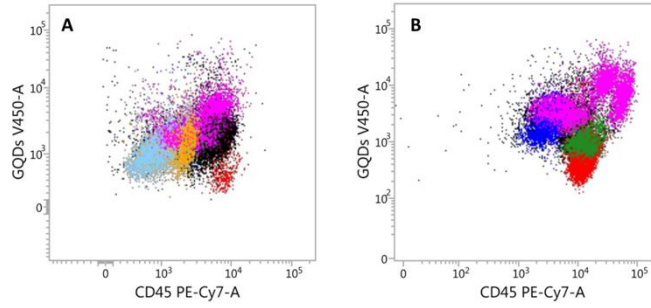

**Fig. S3:** CD45 vs. V450 plot, shown exemplarily for AML 1 (A) and donor 3 (B). The colours are rear projections of other set gates CD33<sup>+</sup> (pink), CD34<sup>+</sup> (blue), CD19<sup>+</sup> (green), CD3<sup>+</sup> (red), CD34<sup>+</sup>/CD33<sup>-</sup> (light blue) and CD33<sup>-</sup>/CD34<sup>-</sup> (orange).

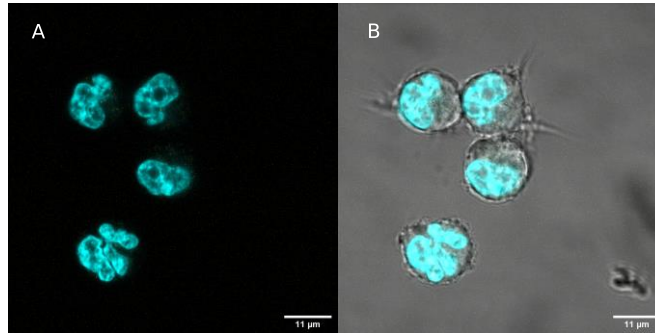

**Fig. S4:** Control samples (HL-60 cells) without CNDs. The nuclei are stained with Hoechst 33342.

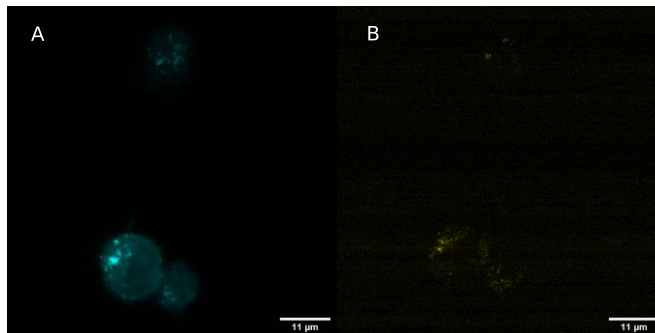

**Fig. S5:** Control sample of CND-exposed HL-60 cells with the nuclei unstained. The CNDs show fluorescence in the blue (a) and in the yellow (B) channel.
